# Supplementary material
Source: ML conference proceedings conference paper supplement (https://openreview.net/forum?id=FnFf7Ru2ur)
Supplement: supplementary_material [file NeurIPS_2025_bytes_sup.pdf › NeurIPS_2025_bytes_sup.pdf]

## A Scaling Laws

Every parameter goes through a multiplication and addition per input unit in the forward pass, and twice that in the backward pass resulting in 6 flops per parameter per input. For the attention mechanism, the  $QK^T$  operation dominates the computational cost, requiring 2 FLOPs (multiply and add) per dimension for each query-key pair. With  $d$  dimensions,  $L$  layers, and a sequence length of  $S$ , this creates  $S$  dot products per layer per input unit. Accounting for both forward and backward passes ( $3\times$  multiplier), we get  $6dLS$  FLOPs total. This term becomes particularly significant at smaller scales where attention costs outweigh the linear parameter costs as Bi et al. [11] already point out.

Notice how the batch size is not simply a difference in constant factor but also in the exponent. In our experiments, we find that many values of batch size and learning rates are possible and that optimal models for a given compute budget lie roughly on a line in BSZ/LR space such that both grow linearly with respect to each other. This of course is only valid for a certain range of values above which the model becomes unstable and loses performance. Our hypothesis is that simply scaling the batch size such that it equals  $k \times \text{BSZ}_{\text{BPE}}$  results in a model that is beyond that limit.

## B Regular expression

To be concrete, the regular expression used to define Stage 1 pooling is shown below:

```
(\p{L}{1,16}) | \p{N}{1,3} | ?([^\s\p{L}\p{N}]){1,3}+[\r\n]* | \s*[\r\n] | \s+(?!$) | \s+
```

Each component of the regex serves a distinct role:

- **Letters (1–16 characters)**: captures typical alphabetic words.
- **Numbers (1–3 digits)**: groups numerical tokens.
- **Punctuation (1–3 non-alphanumeric chars)**: handles symbol groups and optional line breaks.
- **Line breaks**: captures `\r\n` combinations and surrounding whitespace.
- **Trailing whitespace (non-followed by a non-space)**: captures text boundaries.
- **General whitespace**: handles space separation.

## C Ablation

### C.1 Pooling and Upsampling

We describe here the different pooling and upsampling strategies explored during our experiments. While all pooling methods yielded comparable results, they offer different trade-offs in complexity and expressiveness.

**Simple Pooling.** This is the method used in our main experiments. We directly select the positions indicated by the splitting function and retain only those tokens.

**Cross-Attention Pooling.** A cross-attention layer is applied between the original sequence and the pooled tokens. This allows the downsampled representation to aggregate information flexibly from the full input.

**Average Pooling.** Tokens within each segment defined by the splitting function are averaged to produce a single pooled representation.

**Memory Layers [28].** Motivated by the concern that pooling might limit output diversity compared to embedding-table, we experimented with appending a memory layer after pooling. This layer retrieves learned embeddings based on the pooled inputs, potentially reintroducing back the diversity.

**Simple Upsampling.** Pooled tokens are inserted back into their original positions in the sequence, and additional context is recovered via skip connections. Earlier-layer features complement the compressed representations, and attention layers help propagate information across the sequence.

**Cross-Attention Upsampling.** A cross-attention layer is applied where each upsampled token attends to the pooled representation. This mechanism allows the model to flexibly decompress higher-level abstract representations, effectively extracting contextual information to reconstruct the outputs.

**Repeat Upsampling.** Inspired by nearest-neighbor upscaling in computer vision, each token in the

Table 4: Comparison between the different upsampling tools. Notice that AU-Net 3 stages is much more sensitive to upsampling.

| Model                                                              | Hswg                 | Arc_E                | Arc_C                | PIQA                 | SIQA                 | Race_MR              | Race_HW              | Winog                | NQ                  | TQA                  |
|--------------------------------------------------------------------|----------------------|----------------------|----------------------|----------------------|----------------------|----------------------|----------------------|----------------------|---------------------|----------------------|
| <b>Dim=2048 (1B model), 60B tokens (data-to-model ratio of 10)</b> |                      |                      |                      |                      |                      |                      |                      |                      |                     |                      |
| AU-Net 2<br>Simple                                                 | 62.9<br>± 0.9        | 64.9<br>± 1.9        | <b>35.5</b><br>± 2.7 | 73.4<br>± 2.0        | 45.7<br>± 2.2        | 54.1<br>± 2.6        | 39.3<br>± 1.6        | 60.5<br>± 2.7        | 7.7 ±<br>0.9        | 16.6<br>± 0.7        |
| AU-Net 2<br>Average Pool                                           | 62.5<br>± 1.0        | 61.5<br>± 2.0        | 35.4<br>± 2.7        | 72.9<br>± 2.0        | 44.7<br>± 2.2        | 52.2<br>± 2.6        | 36.9<br>± 1.6        | 60.4<br>± 2.7        | 7.2 ±<br>0.8        | 15.5<br>± 0.7        |
| AU-Net 2<br>Memory Layer                                           | 62.8<br>± 0.9        | <b>66.5</b><br>± 1.9 | 34.4<br>± 2.7        | 72.2<br>± 2.0        | 45.3<br>± 2.2        | <b>55.2</b><br>± 2.6 | 38.7<br>± 1.6        | 61.3<br>± 2.7        | 8.0 ±<br>0.9        | 16.6<br>± 0.7        |
| AU-Net 2<br>Repeat Up                                              | <b>64.2</b><br>± 0.9 | 64.4<br>± 1.9        | 35.2<br>± 2.7        | <b>74.4</b><br>± 2.0 | <b>46.1</b><br>± 2.2 | 53.9<br>± 2.6        | 39.0<br>± 1.6        | 61.7<br>± 2.7        | <b>8.8 ±</b><br>0.9 | <b>20.4</b><br>± 0.7 |
| AU-Net 2<br>Multi-Linear                                           | <b>63.5</b><br>± 0.9 | 64.4<br>± 1.9        | 35.3<br>± 2.7        | 74.0<br>± 2.0        | 45.3<br>± 2.2        | 55.1<br>± 2.5        | <b>39.6</b><br>± 1.6 | <b>62.6</b><br>± 2.6 | 8.3 ±<br>0.9        | 18.4<br>± 0.7        |
| AU-Net 3<br>Simple                                                 | 60.6<br>± 1.0        | 60.8<br>± 2.0        | 32.3<br>± 2.7        | 72.1<br>± 2.1        | 46.3<br>± 2.2        | 53.1<br>± 2.6        | 38.6<br>± 1.6        | 62.0<br>± 2.6        | 6.0 ±<br>0.8        | 13.3<br>± 0.6        |
| AU-Net 3<br>Multi-Linear                                           | <b>66.0</b><br>± 0.9 | <b>64.1</b><br>± 1.9 | <b>35.7</b><br>± 2.7 | <b>75.1</b><br>± 2.0 | <b>45.9</b><br>± 2.2 | <b>55.4</b><br>± 2.5 | <b>39.3</b><br>± 1.6 | <b>64.0</b><br>± 2.6 | <b>7.3 ±</b><br>0.9 | <b>18.7</b><br>± 0.7 |

compressed sequence is repeated a variable number of times, as determined by the splitting function. For this strategy to remain competitive during training, it is important to include local positional biases within each repeated segment.

**Multi-Linear Upsampling.** Each pooled token is transformed using a different linear projection for each position in the target segment. This allows upsampled tokens to vary based on their relative position while remaining conditioned on the same source. This method is used in our main experiments due to its favorable balance between simplicity and expressiveness.

## C.2 Layer Allocations

To evaluate the impact of distributing different numbers of layers across stages, we conducted ablations varying the layer allocation strategy. The first stage (byte level) is fixed to three layers for all models. As shown in table 5, we allocate a certain percentage of the total layers to the final stage (stage 3), while ensuring that each intermediate stage retains at least three layers.

We report results for several allocation schemes, and retain the 75% variant—where 75% of the layers are allocated to the final stage—as the default configuration in the main paper.

Table 5: Comparison between the different layer percentages in the last stage (the third one).

| Model                                                              | Hswg          | Arc_E         | Arc_C         | PIQA          | SIQA          | Race_MR       | Race_HW       | Winog         | NQ           | TQA           |
|--------------------------------------------------------------------|---------------|---------------|---------------|---------------|---------------|---------------|---------------|---------------|--------------|---------------|
| <b>Dim=2048 (1B model), 60B tokens (data-to-model ratio of 10)</b> |               |               |               |               |               |               |               |               |              |               |
| AUNet 3<br>(25%)                                                   | 65.3<br>± 0.9 | 63.3<br>± 1.9 | 36.0<br>± 2.8 | 74.2<br>± 2.0 | 46.8<br>± 2.2 | 54.8<br>± 2.6 | 38.7<br>± 1.6 | 63.4<br>± 2.6 | 8.9 ±<br>0.9 | 21.0<br>± 0.8 |
| AUNet 3<br>(50%)                                                   | 66.0<br>± 0.9 | 64.1<br>± 1.9 | 35.7<br>± 2.7 | 75.1<br>± 2.0 | 45.9<br>± 2.2 | 55.4<br>± 2.6 | 39.3<br>± 1.6 | 64.0<br>± 2.7 | 7.3 ±<br>0.9 | 18.7<br>± 0.7 |
| AUNet 3<br>(75%)                                                   | 67.4<br>± 0.9 | 65.9<br>± 1.9 | 36.7<br>± 2.7 | 75.5<br>± 2.0 | 46.9<br>± 2.2 | 55.4<br>± 2.5 | 40.5<br>± 1.6 | 64.2<br>± 2.6 | 9.6 ±<br>1.0 | 22.6<br>± 0.8 |

## D Hyperparameters

As explained in section 2.3, we use a specific batch size and learning rate for each compute budget and architecture. Aside from this, all other hyperparameters remain fixed. A summary table of all hyperparameters can be found in table 6. We use sequence packing for dataloading during training along with FSDP. The complete details can be seen in appendix G.

| Model  | LR               | BSZ             | w.d. | lr min                       | grad clip | seqlen | total tokens                                                         |
|--------|------------------|-----------------|------|------------------------------|-----------|--------|----------------------------------------------------------------------|
| BPE    | $19.3C^{-0.177}$ | $29.9C^{0.231}$ | 0.1  | $0.01 \times \text{lr\_max}$ | 0.2       | 2048   | $(F_{\text{model}} / \text{token})^2 \gamma_{\text{token}}$          |
| AU-Net | $6.6C^{-0.176}$  | $0.66C^{0.321}$ | 0.1  | $0.01 \times \text{lr\_max}$ | 0.2       | 8192   | $(F_{\text{model}} / \text{byte})^2 (20.7936 \gamma_{\text{token}})$ |

Table 6: Summary of all hyperparameters. *w.d.* stands for weight decay.  $\gamma_{\text{tokens}}$  corresponds to the data-to-model ratio and is reported in bold in each result table, alongside the budget  $C$ . Flops per token/byte are detailed in the table of appendix G. Warmup spans 10% of the total training steps, and we employ a cosine learning rate scheduler. The total number of steps is computed as  $\frac{\text{total\_tokens}}{\text{BSZ}}$ .

We also add hyperparameters sweep details as described in section 2.3 for both AU-Net and BPE:

Hyperparameters vs. Compute (highlighted = within 1.0% of best)

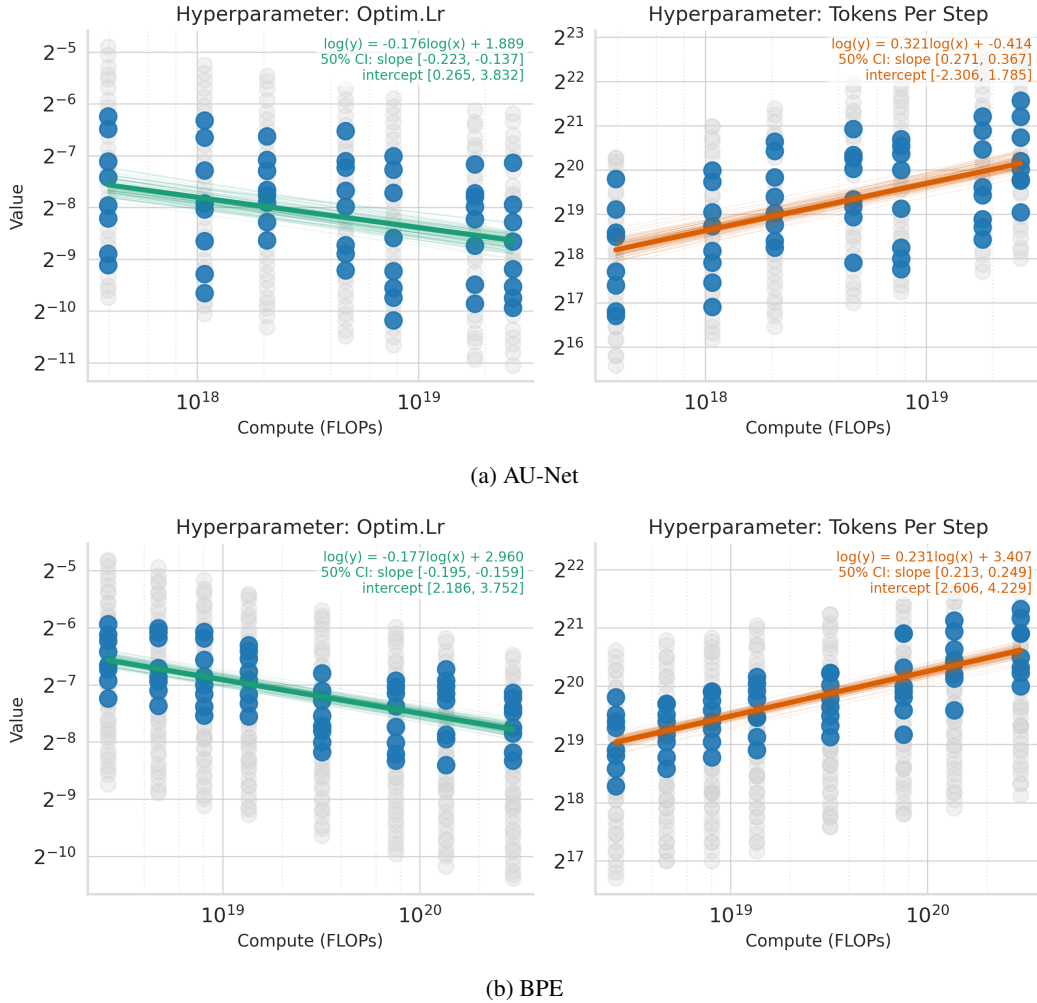

Figure 4: Hyperparameter sweep with fitting: learning rate (left) and batch size (right) for both AU-Net (top) and BPE (bottom).

Figure 4 summarizes the hyperparameter sweeps on DCLM across model scales. We find a broad region of stable configurations rather than a single narrow optimum, indicating that AU-Net trains reliably over a wide range of learning rates (LR) and batch sizes (BSZ). Smaller AU-Net variants remain stable even at high learning rates (up to  $1.5 \times 10^{-2}$ ), suggesting strong tolerance to aggressive optimization. Compared to the baseline BPE Transformer, AU-Net follows a similar LR compute scaling trend but with a lower intercept, reflecting slightly smaller effective learning rates but that decay at the same rate. Batch size increases consistently with compute, starting from smaller values and scaling smoothly, which indicates good parallelization potential at larger scales.

## E CUTE Benchmark Detailed results

We evaluate both the 7.5B BPE baseline and AU-Net 2 on the CUTE benchmark [17], which tests a model’s ability to manipulate both words and characters. As shown in Table 7, our byte-level model performs better on character-level tasks, while the BPE baseline takes the lead on word-level ones. This reflects a natural trade-off: tokenizer-based models operate on word-like units, making them less sensitive to character structure, whereas byte-level models handle characters explicitly.

This contrast highlights a key design trade-off. Byte-level models are more flexible with unseen or morphologically rich inputs, while tokenized models benefit from stronger word-level priors. Surprisingly, despite lacking explicit character access, BPE models still perform well on spelling and reverse spelling tasks, suggesting that such skills can emerge from token-level patterns with enough capacity and data.

Table 7: Accuracy of BPE and AU-Net on word-level and letter-level tasks in CUTE.

| CUTE (EM)      | Rand | BPE         |             | AU-Net 2    |             |
|----------------|------|-------------|-------------|-------------|-------------|
|                |      | Word        | Char        | Word        | Char        |
| Spell          | 0.0  | -           | 91.5        | -           | <b>97.3</b> |
| Inverse spell  | 0.0  | -           | 80.6        | -           | <b>91.7</b> |
| Contains       | 50.0 | <b>69.9</b> | <b>66.7</b> | 61.3        | 59.8        |
| Delete         | 0.0  | <b>29.6</b> | 16.4        | 20.6        | <b>22.3</b> |
| Insert         | 0.0  | <b>15.9</b> | <b>9.6</b>  | 6.5         | 7.8         |
| Substitute     | 0.0  | <b>37.5</b> | 7.6         | 21.2        | <b>12.3</b> |
| Swap           | 0.0  | <b>5.5</b>  | 1.6         | 3.3         | <b>1.9</b>  |
| Sem/Ortho      | 50.0 | 66.0        | 40.6        | <b>75.1</b> | <b>48.1</b> |
| <b>Average</b> | 12.5 | <b>36.9</b> | 39.3        | 33.1        | <b>42.7</b> |

## F Evaluation Benchmarks Details

| Model                                                               | Hllswg              | Arc_E               | Arc_C               | Boolq               | CSQA                | MMLU                | OBQA                | PIQA                | SIQA                | Race_M              | Race_H              | Winog.              | NQ                  | TQA                 | GSM8k                 |
|---------------------------------------------------------------------|---------------------|---------------------|---------------------|---------------------|---------------------|---------------------|---------------------|---------------------|---------------------|---------------------|---------------------|---------------------|---------------------|---------------------|-----------------------|
| <b>Dim=2048 (1B model), 60B tokens (data-to-model ratio of 10)</b>  |                     |                     |                     |                     |                     |                     |                     |                     |                     |                     |                     |                     |                     |                     |                       |
| Mamba bytes                                                         | 63.0<br>±0.9        | 60.3<br>±2.0        | 33.6<br>±2.7        | 61.2<br>±1.7        | 19.6<br>±2.3        | 25.3<br>±0.7        | <b>38.4</b><br>±4.2 | 75.1<br>±2.0        | 45.8<br>±2.2        | 46.7<br>±2.6        | 35.2<br>±1.6        | 59.1<br>±2.7        | 8.2 ±<br>0.9        | 21.2<br>±0.7        | 2.1 ±<br>0.8          |
| Transformer bytes                                                   | 63.0<br>±0.9        | 61.2<br>±2.0        | 34.7<br>±2.7        | 60.7<br>±1.7        | 20.0<br>±2.3        | 24.7<br>±0.7        | <b>38.4</b><br>±4.3 | 74.5<br>±2.0        | 47.1<br>±2.2        | 52.1<br>±2.5        | 37.7<br>±1.6        | 58.2<br>±2.8        | 8.8 ±<br>0.9        | 21.4<br>±0.8        | 2.5 ±<br>0.8          |
| Transformer bytes[:4]                                               | 63.5<br>±0.9        | 63.0<br>±2.0        | 36.0<br>±2.7        | 63.4<br>±1.7        | 18.8<br>±2.2        | 25.1<br>±0.7        | 39.0<br>±4.2        | 73.0<br>±2.1        | 46.4<br>±2.2        | 53.5<br>±2.5        | 40.1<br>±1.6        | 62.3<br>±2.7        | 6.8 ±<br>0.8        | 17.2<br>±0.7        | 2.6 ±<br>0.9          |
| Transformer bytes[:5]                                               | 60.0<br>±1.0        | 60.0<br>±2.0        | 34.8<br>±2.7        | 61.4<br>±1.7        | 17.9<br>±2.1        | 23.9<br>±0.7        | 37.2<br>±4.3        | 72.0<br>±2.0        | 45.4<br>±2.2        | 51.5<br>±2.6        | 39.4<br>±1.6        | 57.2<br>±2.8        | 5.6 ±<br>0.8        | 14.7<br>±0.7        | 2.0 ±<br>0.8          |
| Transformer bytes[:6]                                               | 58.6<br>±1.0        | 59.5<br>±2.0        | 32.4<br>±2.7        | 60.6<br>±1.7        | 18.7<br>±2.2        | 24.9<br>±0.7        | 35.6<br>±4.2        | 70.0<br>±2.1        | 44.5<br>±2.2        | 51.3<br>±2.5        | 37.4<br>±1.6        | 59.3<br>±2.7        | 4.6 ±<br>0.7        | 12.3<br>±0.6        | 2.3 ±<br>0.8          |
| AUNet 2                                                             | 64.2<br>±0.9        | 64.4<br>±1.9        | 35.2<br>±2.7        | 62.0<br>±1.7        | <b>20.1</b><br>±2.2 | 24.5<br>±0.7        | 36.8<br>±4.2        | 74.4<br>±2.0        | 46.1<br>±2.3        | 53.9<br>±2.5        | 39.0<br>±1.6        | 61.7<br>±2.7        | 8.8 ±<br>0.9        | 20.4<br>±0.7        | 2.7 ±<br>0.9          |
| AUNet 3                                                             | <b>67.4</b><br>±0.9 | 65.9<br>±1.9        | 36.7<br>±2.8        | 61.7<br>±1.7        | 19.7<br>±2.2        | 25.6<br>±0.7        | 38.2<br>±4.3        | <b>75.5</b><br>±2.0 | 46.9<br>±2.2        | 55.4<br>±2.5        | <b>40.5</b><br>±1.6 | <b>64.2</b><br>±2.6 | <b>9.6</b> ±<br>1.0 | <b>22.6</b><br>±1.5 | 2.3 ±<br><b>3.5</b> ± |
| AUNet 4                                                             | 66.4<br>±0.9        | <b>67.4</b><br>±1.9 | <b>37.0</b><br>±2.8 | <b>63.3</b><br>±1.7 | 18.2<br>±2.1        | <b>25.9</b><br>±0.7 | 38.2<br>±4.3        | 74.5<br>±2.0        | <b>47.6</b><br>±2.3 | <b>55.6</b><br>±2.6 | 39.3<br>±1.6        | 62.0<br>±2.6        | 5.1 ±<br>0.7        | 15.5<br>±0.7        | <b>3.5</b> ±<br>1.0   |
| Transformer BPE                                                     | 63.6<br>±0.9        | 62.8<br>±2.0        | 36.5<br>±2.7        | 62.6<br>±1.6        | 18.8<br>±2.2        | 25.5<br>±0.7        | 37.4<br>±4.3        | 75.1<br>±2.0        | 45.2<br>±2.2        | 53.9<br>±2.6        | 39.3<br>±1.6        | 61.6<br>±2.7        | 8.8 ±<br>0.9        | 26.3<br>±0.8        | 2.3 ±<br>0.8          |
| <b>Dim=2048 (1B model), 370B tokens (data-to-model ratio of 40)</b> |                     |                     |                     |                     |                     |                     |                     |                     |                     |                     |                     |                     |                     |                     |                       |
| AUNet 2                                                             | 69.9<br>±0.9        | 68.6<br>±1.9        | 38.9<br>±2.8        | 64.3<br>±1.7        | 20.8<br>±2.3        | 27.9<br>±0.7        | 39.6<br>±4.4        | 76.8<br>±1.9        | 46.6<br>±2.2        | 57.7<br>±2.5        | 42.8<br>±1.7        | 64.6<br>±2.6        | 13.0<br>±1.1        | 32.5<br>±0.9        | 3.0 ±<br>0.9          |
| AUNet 3                                                             | 72.9<br>±0.9        | 72.3<br>±1.8        | <b>43.3</b><br>±2.9 | 61.8<br>±1.7        | 19.7<br>±2.3        | 27.5<br>±0.7        | <b>41.6</b><br>±4.3 | <b>78.1</b><br>±1.9 | 47.1<br>±2.3        | 58.8<br>±2.6        | 43.3<br>±1.7        | <b>68.7</b><br>±2.6 | <b>15.3</b><br>±1.2 | <b>39.1</b><br>±0.9 | 3.7 ±<br>1.0          |
| AUNet 4                                                             | <b>73.7</b><br>±0.9 | <b>72.6</b><br>±1.8 | 43.2<br>±2.8        | 62.0<br>±1.7        | <b>23.1</b><br>±2.4 | <b>31.1</b><br>±0.8 | 40.8<br>±4.2        | 78.0<br>±1.9        | <b>47.6</b><br>±2.2 | <b>59.0</b><br>±2.6 | <b>43.9</b><br>±1.7 | 67.2<br>±2.6        | 14.0<br>±1.1        | 35.5<br>±0.9        | <b>5.3</b> ±<br>1.2   |
| Transformer BPE                                                     | 70.2<br>±0.9        | 68.6<br>±1.9        | 38.5<br>±2.8        | <b>62.9</b><br>±1.7 | 21.8<br>±2.3        | 26.3<br>±0.7        | 40.6<br>±4.3        | 76.9<br>±1.9        | 46.2<br>±2.2        | 56.7<br>±2.6        | 41.8<br>±1.6        | 65.4<br>±2.6        | 13.6<br>±1.1        | 37.2<br>±0.9        | 4.4 ±<br>1.1          |
| <b>Dim=4096 (8B model), 200B tokens (data-to-model ratio of 5)</b>  |                     |                     |                     |                     |                     |                     |                     |                     |                     |                     |                     |                     |                     |                     |                       |
| AUNet 2 7B                                                          | <b>79.1</b><br>±0.8 | <b>80.0</b><br>±1.6 | <b>51.2</b><br>±2.9 | <b>68.3</b><br>±1.6 | <b>63.6</b><br>±2.7 | <b>50.0</b><br>±0.8 | <b>45.0</b><br>±4.4 | <b>80.1</b><br>±1.8 | <b>50.0</b><br>±2.3 | <b>61.9</b><br>±2.5 | <b>44.4</b><br>±1.7 | <b>72.2</b><br>±2.4 | <b>22.1</b><br>±1.3 | 50.9<br>±0.9        | 10.0<br>±1.6          |
| Transformer 7B                                                      | 77.3<br>±0.8        | 74.3<br>±1.8        | 49.5<br>±2.9        | 63.8<br>±1.7        | 63.2<br>±2.7        | 48.4<br>±0.8        | 43.6<br>±4.3        | 80.0<br>±1.8        | 48.4<br>±2.2        | 60.3<br>±2.5        | 43.6<br>±1.6        | 70.5<br>±2.5        | 21.1<br>±1.3        | <b>51.1</b><br>±0.9 | <b>10.7</b><br>±1.7   |
| LLaMa 3.1 (15T)                                                     | 80.7<br>±0.8        | 83.3<br>±1.5        | 54.8<br>±2.8        | 75.0<br>±1.5        | 74.6<br>±2.5        | 65.4<br>±0.8        | 45.4<br>±4.4        | 80.8<br>±1.8        | 49.6<br>±2.3        | 65.3<br>±2.5        | 49.4<br>±1.7        | 74.5<br>±2.4        | 29.1<br>±1.5        | 64.4<br>±0.9        | 54.7<br>±2.7          |

Table 8: Performance of AU-Net on many benchmarks.

## G List of Models

This appendix provides detailed configuration parameters for all models used in the experiments, organized into three categories for clarity.

Table 9: Model architecture parameters including dimensions, layers, and FFN sizes. Semicolons separated values for different stages in hierarchical models. The values shown in the “Layers” column correspond to the number of layers on both sides of the U-Net, except for the final value on the right, which represents the central stage. For example, AU-Net 3 1B row has  $3 \times 2 + 3 \times 2 + 18 = 30$  layers in total.

| Name                   | Dim                   | Layers      | Head Dim          | FFN Dim                 |
|------------------------|-----------------------|-------------|-------------------|-------------------------|
| Transformer bytes 1B   | 2048                  | 25          | 128               | 5632                    |
| Mamba bytes 1B         | 2048                  | 25          | 64                | 5632                    |
| Transformer 1B BPE     | 2048                  | 25          | 128               | 5632                    |
| AUNet 2 1B             | 512; 2048             | 3; 25       | 64; 128           | 1536; 5632              |
| AUNet 3 1B             | 512; 2048; 3072       | 3; 3; 18    | 64; 128; 128      | 1536; 5632; 8192        |
| AUNet 4 1B             | 512; 2048; 3072; 4608 | 3; 3; 4; 10 | 64; 128; 128; 128 | 1536; 5632; 8192; 12288 |
| Transformer 1B dm8 BPE | 2048                  | 25          | 128               | 5632                    |
| AUNet 2 1B dm8         | 512; 2048             | 3; 25       | 64; 128           | 1536; 5632              |
| AUNet 3 1B dm8         | 512; 2048; 3072       | 3; 3; 18    | 64; 128; 128      | 1536; 5632; 8192        |
| AUNet 4 1B dm8         | 512; 2048; 3072; 4608 | 3; 3; 3; 12 | 64; 128; 128; 128 | 1536; 5632; 8192; 12288 |
| Transformer 7B dm1     | 4096                  | 32          | 128               | 11008                   |
| AUNet 2 7B dm1         | 1024; 4096            | 3; 32       | 64; 128           | 4096; 14336             |
| Scaling baseline 1e19  | 1024                  | 12          | 128               | 2816                    |
| Scaling baseline 2e19  | 1152                  | 13          | 128               | 3072                    |
| Scaling baseline 4e19  | 1280                  | 14          | 128               | 3584                    |
| Scaling baseline 8e19  | 1536                  | 15          | 128               | 4096                    |
| Scaling baseline 1e20  | 1664                  | 17          | 128               | 4608                    |
| Scaling baseline 3e20  | 1792                  | 20          | 128               | 4864                    |
| Scaling baseline 5e20  | 2048                  | 21          | 128               | 5632                    |
| Scaling baseline 1e21  | 2304                  | 24          | 128               | 6144                    |
| Scaling baseline 2e21  | 2560                  | 26          | 128               | 6912                    |
| Scaling baseline 3e21  | 2816                  | 29          | 128               | 7680                    |
| Scaling baseline 6e21  | 3072                  | 34          | 128               | 8192                    |
| Scaling baseline 1e22  | 3456                  | 37          | 128               | 9216                    |
| Scaling AUNet 2 1e19   | 256; 1024             | 3; 11       | 64; 128           | 768; 2816               |
| Scaling AUNet 2 2e19   | 256; 1152             | 3; 13       | 64; 128           | 768; 3072               |
| Scaling AUNet 2 4e19   | 256; 1280             | 3; 14       | 64; 128           | 768; 3584               |
| Scaling AUNet 2 8e19   | 384; 1536             | 3; 14       | 64; 128           | 1024; 4096              |
| Scaling AUNet 2 1e20   | 384; 1536             | 3; 19       | 64; 128           | 1024; 4096              |
| Scaling AUNet 2 3e20   | 512; 1920             | 3; 17       | 64; 128           | 1536; 5120              |
| Scaling AUNet 2 5e20   | 512; 2048             | 3; 21       | 64; 128           | 1536; 5632              |
| Scaling AUNet 2 9e20   | 512; 2304             | 3; 24       | 64; 128           | 1536; 6144              |
| Scaling AUNet 2 2e21   | 640; 2560             | 3; 26       | 64; 128           | 1792; 6912              |
| Scaling AUNet 2 3e21   | 640; 2688             | 3; 33       | 64; 128           | 1792; 7168              |
| Scaling AUNet 2 6e21   | 768; 3200             | 3; 32       | 64; 128           | 2048; 8704              |
| Scaling AUNet 2 1e22   | 896; 3584             | 3; 35       | 64; 128           | 2560; 9728              |
| Scaling AUNet 3 1e19   | 256; 1024; 1536       | 3; 3; 4     | 64; 128; 128      | 768; 2816; 4096         |
| Scaling AUNet 3 2e19   | 256; 1152; 1792       | 3; 3; 5     | 64; 128; 128      | 768; 3072; 4864         |
| Scaling AUNet 3 5e19   | 256; 1280; 1920       | 3; 3; 7     | 64; 128; 128      | 768; 3584; 5120         |
| Scaling AUNet 3 7e19   | 256; 1280; 1920       | 3; 3; 10    | 64; 128; 128      | 768; 3584; 5120         |
| Scaling AUNet 3 2e20   | 384; 1536; 2304       | 3; 3; 10    | 64; 128; 128      | 1024; 4096; 6144        |
| Scaling AUNet 3 3e20   | 384; 1536; 2304       | 3; 3; 15    | 64; 128; 128      | 1024; 4096; 6144        |
| Scaling AUNet 3 5e20   | 512; 1920; 2816       | 3; 3; 13    | 64; 128; 128      | 1536; 5120; 7680        |
| Scaling AUNet 3 9e20   | 512; 2048; 3072       | 3; 3; 16    | 64; 128; 128      | 1536; 5632; 8192        |
| Scaling AUNet 3 2e21   | 512; 2304; 3456       | 3; 3; 18    | 64; 128; 128      | 1536; 6144; 9216        |
| Scaling AUNet 3 3e21   | 640; 2560; 3840       | 3; 3; 21    | 64; 128; 128      | 1792; 6912; 10240       |
| Scaling AUNet 3 6e21   | 640; 2688; 4096       | 3; 3; 26    | 64; 128; 128      | 1792; 7168; 11008       |
| Scaling AUNet 3 1e22   | 768; 3200; 4864       | 3; 3; 26    | 64; 128; 128      | 2048; 8704; 13056       |

Table 10: Training configuration including computational costs, steps, batch sizes, and tokenization

| Name                   | Total FLOPs | Tokens/Step | FLOPs/Token | Steps  | G/Acc | Batch Size | Seq Len | NGpus | Tokenizer |
|------------------------|-------------|-------------|-------------|--------|-------|------------|---------|-------|-----------|
| Transformer bytes 1B   | nan         | nan         | nan         | 60000  | 1     | 4          | 4096    | NaN   | bytes     |
| Mamba bytes 1B         | nan         | nan         | nan         | 60000  | 1     | 4          | 4096    | NaN   | bytes     |
| Transformer 1B BPE     | 6.6e20      | 1.0e06      | 1.1e10      | 60000  | 1     | 4          | 4096    | 64    | tiktoken  |
| AUNet 2 1B             | 5.1e20      | 1.6e06      | 1.8e09      | 180000 | 1     | 12         | 8192    | 16    | bytes     |
| AUNet 3 1B             | 6.7e20      | 2.8e06      | 2.3e09      | 105000 | 1     | 14         | 8192    | 24    | bytes     |
| AUNet 4 1B             | 8.0e20      | 2.8e06      | 2.8e09      | 105000 | 1     | 14         | 8192    | 24    | bytes     |
| Transformer 1B dm8 BPE | 3.6e21      | 1.2e06      | 9.9e09      | 310000 | 1     | 9          | 2048    | 64    | tiktoken  |
| AUNet 2 1B dm8         | 3.2e21      | 1.8e06      | 1.8e09      | 950000 | 1     | 7          | 8192    | 32    | bytes     |
| AUNet 3 1B dm8         | 4.0e21      | 5.8e06      | 2.3e09      | 300000 | 1     | 11         | 8192    | 64    | bytes     |
| AUNet 4 1B dm8         | 5.0e21      | 5.8e06      | 2.9e09      | 300000 | 1     | 11         | 8192    | 64    | bytes     |
| Transformer 7B dm1     | 9.5e21      | 2.1e06      | 4.5e10      | 100000 | 1     | 2          | 4096    | 256   | tiktoken  |
| AUNet 2 7B dm1         | 1.2e22      | 4.2e06      | 1.0e10      | 277834 | 1     | 1          | 8192    | 128   | bytes     |
| Scaling baseline 1e19  | 2.0e19      | 7.7e05      | 1.9e09      | 14008  | 15    | 25         | 2048    | 1     | tiktoken  |
| Scaling baseline 2e19  | 3.3e19      | 8.8e05      | 2.3e09      | 16120  | 18    | 24         | 2048    | 1     | tiktoken  |
| Scaling baseline 4e19  | 5.6e19      | 9.9e05      | 2.9e09      | 19438  | 22    | 22         | 2048    | 1     | tiktoken  |
| Scaling baseline 8e19  | 1.1e20      | 1.2e06      | 4.0e09      | 24252  | 15    | 19         | 2048    | 2     | tiktoken  |
| Scaling baseline 1e20  | 2.0e20      | 1.4e06      | 5.1e09      | 28160  | 13    | 17         | 2048    | 3     | tiktoken  |
| Scaling baseline 3e20  | 3.3e20      | 1.6e06      | 6.5e09      | 32466  | 11    | 14         | 2048    | 5     | tiktoken  |
| Scaling baseline 5e20  | 6.0e20      | 1.8e06      | 8.6e09      | 39573  | 12    | 12         | 2048    | 6     | tiktoken  |
| Scaling baseline 1e21  | 1.1e21      | 2.1e06      | 1.2e10      | 46980  | 4     | 8          | 2048    | 32    | tiktoken  |
| Scaling baseline 2e21  | 2.0e21      | 2.4e06      | 1.5e10      | 55900  | 4     | 9          | 2048    | 32    | tiktoken  |
| Scaling baseline 3e21  | 3.6e21      | 2.8e06      | 2.0e10      | 64711  | 3     | 7          | 2048    | 64    | tiktoken  |
| Scaling baseline 6e21  | 6.5e21      | 3.1e06      | 2.7e10      | 77520  | 4     | 6          | 2048    | 64    | tiktoken  |
| Scaling baseline 1e22  | 1.2e22      | 3.9e06      | 3.6e10      | 84915  | 3     | 5          | 2048    | 128   | tiktoken  |
| Scaling AUNet 2 1e19   | 1.1e19      | 8.7e05      | 2.4e08      | 56240  | 2     | 53         | 8192    | 1     | bytes     |
| Scaling AUNet 2 2e19   | 2.2e19      | 1.1e06      | 3.2e08      | 63457  | 3     | 43         | 8192    | 1     | bytes     |
| Scaling AUNet 2 4e19   | 3.7e19      | 1.3e06      | 4.2e08      | 68794  | 4     | 39         | 8192    | 1     | bytes     |
| Scaling AUNet 2 8e19   | 7.6e19      | 1.6e06      | 6.0e08      | 79862  | 6     | 32         | 8192    | 1     | bytes     |
| Scaling AUNet 2 1e20   | 1.3e20      | 1.8e06      | 7.9e08      | 89768  | 4     | 28         | 8192    | 2     | bytes     |
| Scaling AUNet 2 3e20   | 2.6e20      | 2.4e06      | 1.1e09      | 99036  | 4     | 24         | 8192    | 3     | bytes     |
| Scaling AUNet 2 5e20   | 5.0e20      | 2.9e06      | 1.5e09      | 108807 | 4     | 18         | 8192    | 5     | bytes     |
| Scaling AUNet 2 9e20   | 9.3e20      | 3.7e06      | 2.1e09      | 119909 | 1     | 14         | 8192    | 32    | bytes     |
| Scaling AUNet 2 2e21   | 1.7e21      | 4.2e06      | 2.9e09      | 141463 | 2     | 8          | 8192    | 32    | bytes     |
| Scaling AUNet 2 3e21   | 3.1e21      | 5.2e06      | 3.9e09      | 153594 | 2     | 10         | 8192    | 32    | bytes     |
| Scaling AUNet 2 6e21   | 5.9e21      | 6.3e06      | 5.3e09      | 176692 | 1     | 8          | 8192    | 96    | bytes     |
| Scaling AUNet 2 1e22   | 1.1e22      | 7.9e06      | 7.3e09      | 193096 | 1     | 6          | 8192    | 160   | bytes     |
| Scaling AUNet 3 1e19   | 1.3e19      | 9.0e05      | 2.5e08      | 56992  | 2     | 55         | 8192    | 1     | bytes     |
| Scaling AUNet 3 2e19   | 2.4e19      | 1.1e06      | 3.4e08      | 64347  | 3     | 45         | 8192    | 1     | bytes     |
| Scaling AUNet 3 5e19   | 4.7e19      | 1.4e06      | 4.8e08      | 71962  | 4     | 42         | 8192    | 1     | bytes     |
| Scaling AUNet 3 7e19   | 7.3e19      | 1.6e06      | 5.9e08      | 79222  | 5     | 38         | 8192    | 1     | bytes     |
| Scaling AUNet 3 2e20   | 1.5e20      | 2.0e06      | 8.6e08      | 90845  | 4     | 30         | 8192    | 2     | bytes     |
| Scaling AUNet 3 3e20   | 2.7e20      | 2.4e06      | 1.1e09      | 100198 | 4     | 24         | 8192    | 3     | bytes     |
| Scaling AUNet 3 5e20   | 5.2e20      | 2.9e06      | 1.6e09      | 113583 | 2     | 22         | 8192    | 8     | bytes     |
| Scaling AUNet 3 9e20   | 9.2e20      | 3.7e06      | 2.1e09      | 119374 | 1     | 14         | 8192    | 32    | bytes     |
| Scaling AUNet 3 2e21   | 1.7e21      | 4.2e06      | 2.9e09      | 141594 | 1     | 16         | 8192    | 32    | bytes     |
| Scaling AUNet 3 3e21   | 3.3e21      | 5.2e06      | 4.0e09      | 158941 | 1     | 10         | 8192    | 64    | bytes     |
| Scaling AUNet 3 6e21   | 6.0e21      | 6.3e06      | 5.4e09      | 177921 | 1     | 8          | 8192    | 96    | bytes     |
| Scaling AUNet 3 1e22   | 1.2e22      | 8.4e06      | 7.6e09      | 187518 | 1     | 4          | 8192    | 256   | bytes     |

Table 11: Optimization hyperparameters including learning rates, weight decay, and scheduler settings.

| Name                   | LR        | WD    | $\beta_1$ | $\beta_2$ | Scheduler | Warmup |
|------------------------|-----------|-------|-----------|-----------|-----------|--------|
| Transformer bytes 1B   | 0.003     | 0.033 | 0.9       | 0.95      | cosine    | 5000   |
| Mamba bytes 1B         | 0.003     | 0.033 | 0.9       | 0.95      | cosine    | 5000   |
| Transformer 1B BPE     | 0.003     | 0.033 | 0.9       | 0.95      | cosine    | 5000   |
| AUNet 2 1B             | 0.00165   | 0.1   | 0.9       | 0.95      | cosine    | 10000  |
| AUNet 3 1B             | 0.0015    | 0.1   | 0.9       | 0.95      | cosine    | 10000  |
| AUNet 4 1B             | 0.0015    | 0.1   | 0.9       | 0.95      | cosine    | 20000  |
| Transformer 1B dm8 BPE | 0.001     | 0.1   | 0.9       | 0.95      | cosine    | 2000   |
| AUNet 2 1B dm8         | 0.00094   | 0.1   | 0.9       | 0.95      | cosine    | 10000  |
| AUNet 3 1B dm8         | 0.0011    | 0.1   | 0.9       | 0.95      | cosine    | 10000  |
| AUNet 4 1B dm8         | 0.0011    | 0.1   | 0.9       | 0.95      | cosine    | 10000  |
| Transformer 7B dm1     | 0.001     | 0.05  | 0.9       | 0.95      | cosine    | 10000  |
| AUNet 2 7B dm1         | 0.000818  | 0.1   | 0.9       | 0.95      | cosine    | 5000   |
| Scaling baseline 1e19  | 0.008152  | 0.1   | 0.9       | 0.95      | cosine    | 2000   |
| Scaling baseline 2e19  | 0.007378  | 0.1   | 0.9       | 0.95      | cosine    | 2000   |
| Scaling baseline 4e19  | 0.006633  | 0.1   | 0.9       | 0.95      | cosine    | 2000   |
| Scaling baseline 8e19  | 0.005788  | 0.1   | 0.9       | 0.95      | cosine    | 2000   |
| Scaling baseline 1e20  | 0.005204  | 0.1   | 0.9       | 0.95      | cosine    | 2000   |
| Scaling baseline 3e20  | 0.004693  | 0.1   | 0.9       | 0.95      | cosine    | 2000   |
| Scaling baseline 5e20  | 0.0042    | 0.1   | 0.9       | 0.95      | cosine    | 2000   |
| Scaling baseline 1e21  | 0.003722  | 0.1   | 0.9       | 0.95      | cosine    | 2000   |
| Scaling baseline 2e21  | 0.003357  | 0.1   | 0.9       | 0.95      | cosine    | 2000   |
| Scaling baseline 3e21  | 0.003018  | 0.1   | 0.9       | 0.95      | cosine    | 2000   |
| Scaling baseline 6e21  | 0.002701  | 0.1   | 0.9       | 0.95      | cosine    | 2000   |
| Scaling baseline 1e22  | 0.002416  | 0.1   | 0.9       | 0.95      | cosine    | 2000   |
| Scaling AUNet 2 1e19   | 0.002923  | 0.1   | 0.9       | 0.95      | cosine    | 10000  |
| Scaling AUNet 2 2e19   | 0.002615  | 0.1   | 0.9       | 0.95      | cosine    | 10000  |
| Scaling AUNet 2 4e19   | 0.002377  | 0.1   | 0.9       | 0.95      | cosine    | 10000  |
| Scaling AUNet 2 8e19   | 0.002096  | 0.1   | 0.9       | 0.95      | cosine    | 10000  |
| Scaling AUNet 2 1e20   | 0.001906  | 0.1   | 0.9       | 0.95      | cosine    | 10000  |
| Scaling AUNet 2 3e20   | 0.001685  | 0.1   | 0.9       | 0.95      | cosine    | 10000  |
| Scaling AUNet 2 5e20   | 0.001507  | 0.1   | 0.9       | 0.95      | cosine    | 10000  |
| Scaling AUNet 2 9e20   | 0.001348  | 0.1   | 0.9       | 0.95      | cosine    | 10000  |
| Scaling AUNet 2 2e21   | 0.001214  | 0.1   | 0.9       | 0.95      | cosine    | 10000  |
| Scaling AUNet 2 3e21   | 0.00109   | 0.1   | 0.9       | 0.95      | cosine    | 10000  |
| Scaling AUNet 2 6e21   | 0.0009731 | 0.1   | 0.9       | 0.95      | cosine    | 10000  |
| Scaling AUNet 2 1e22   | 0.0008719 | 0.1   | 0.9       | 0.95      | cosine    | 10000  |
| Scaling AUNet 3 1e19   | 0.002872  | 0.1   | 0.9       | 0.95      | cosine    | 10000  |
| Scaling AUNet 3 2e19   | 0.002561  | 0.1   | 0.9       | 0.95      | cosine    | 10000  |
| Scaling AUNet 3 5e19   | 0.002279  | 0.1   | 0.9       | 0.95      | cosine    | 10000  |
| Scaling AUNet 3 7e19   | 0.00211   | 0.1   | 0.9       | 0.95      | cosine    | 10000  |
| Scaling AUNet 3 2e20   | 0.001852  | 0.1   | 0.9       | 0.95      | cosine    | 10000  |
| Scaling AUNet 3 3e20   | 0.001678  | 0.1   | 0.9       | 0.95      | cosine    | 10000  |
| Scaling AUNet 3 5e20   | 0.001496  | 0.1   | 0.9       | 0.95      | cosine    | 10000  |
| Scaling AUNet 3 9e20   | 0.001351  | 0.1   | 0.9       | 0.95      | cosine    | 10000  |
| Scaling AUNet 3 2e21   | 0.001213  | 0.1   | 0.9       | 0.95      | cosine    | 10000  |
| Scaling AUNet 3 3e21   | 0.001077  | 0.1   | 0.9       | 0.95      | cosine    | 10000  |
| Scaling AUNet 3 6e21   | 0.0009707 | 0.1   | 0.9       | 0.95      | cosine    | 10000  |
| Scaling AUNet 3 1e22   | 0.0008612 | 0.1   | 0.9       | 0.95      | cosine    | 10000  |



## H Licences

Table 12: Licensing Summary for Language Model Training and Evaluation Datasets

| <b>Dataset</b>    | <b>License</b>       |
|-------------------|----------------------|
| DCLM              | MIT                  |
| HellaSwag         | MIT                  |
| ARC-Easy          | CC-BY-SA-4.0         |
| ARC-Challenge     | CC-BY-SA-4.0         |
| MMLU              | MIT                  |
| Natural Questions | Apache-2.0           |
| TriviaQA          | Apache-2.0           |
| GSM8K             | MIT                  |
| BoolQ             | CC-SA-3.0            |
| CommonsenseQA     | MIT                  |
| OpenBookQA        | Apache-2.0           |
| PIQA              | Not available        |
| Social IQA        | MIT                  |
| RACE-M            | Custom research only |
| RACE-H            | Custom research only |
| WinoGrande        | Apache-2.0/CC-BY     |
| CUTE              | MIT                  |
| FLORES-200        | CC-BY-SA-4.0         |
| MMLU Multilingual | MIT                  |
| LLaMA 3 Tokenizer | Meta Community       |
